# Supplementary material for: FeV3O8/MoS2 nanostructure heterojunctions as a highly effective electrocatalyst for hydrogen evolution
Source: Royal Society of Chemistry journal article supplement (doi:10.1039/d1tc05180f), 2022-01-01
Supplement: d1tc05180f1.pdf [file d1tc05180f1.pdf]

**Supporting Information**  
**for**  
**FeV<sub>3</sub>O<sub>8</sub>/MoS<sub>2</sub> nanostructure heterojunctions as a highly effective**  
**electrocatalyst for hydrogen evolution**

Zhi Huang<sup>a,1</sup>, Xuejuan Tang<sup>a,1</sup>, Junjie Zhao<sup>a</sup>, Hua Lin<sup>a</sup>, Ming Nie<sup>a</sup>, Qing Li<sup>a\*</sup>

*a. Chongqing Key Laboratory for Advanced Materials and Technologies of Clean  
Energies, School of Materials and Energy, Southwest University, Chongqing 400715,  
China*

*\*Corresponding author: E-mail: [qli@swu.edu.cn](mailto:qli@swu.edu.cn)*

*<sup>1</sup> These authors contributed equally.*

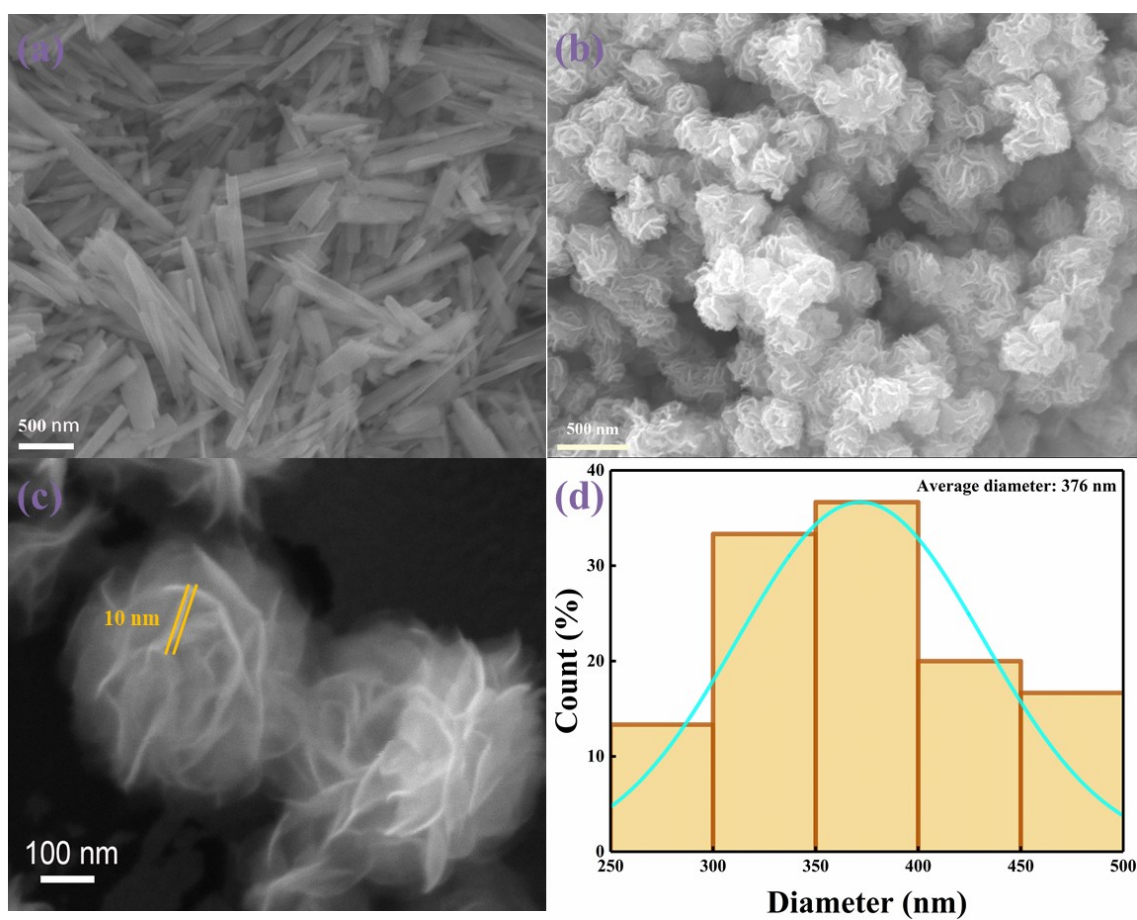

**Fig. S1.** (a) FESEM image of pure FeV<sub>3</sub>O<sub>8</sub> nanorods, (b) Low and (c) high magnification FESEM images of GNs-MoS<sub>2</sub> and (d) Particle size distribution of pure MoS<sub>2</sub>.

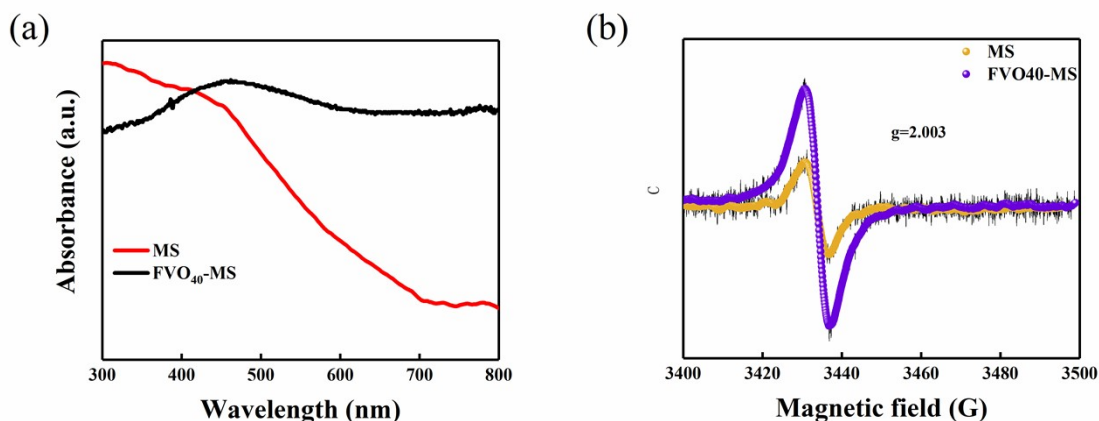

**Fig. S2.** (a) UV-Vis spectra of pure MoS<sub>2</sub> and FVO<sub>40</sub>-MS, (b) EPR spectra for S vacancies of MoS<sub>2</sub> and FVO<sub>40</sub>-MS at room-temperature.

### UV-Vis and EPR analysis of the samples

UV-Vis absorption spectra and electron paramagnetic resonance (EPR) analysis were performed to gain more information for the active defects of FVO/MS heterostructure. In the UV-Vis absorption spectra (Fig. S2a), the FVO<sub>40</sub>-MS shows broaden absorption peaks in the range from 400 to 800 nm compared with MS. Obviously, the absorption capacity of visible light is significantly enhanced in FVO<sub>40</sub>-MS, which could be ascribed to the increased defects in FVO/MS heterojunction structure.<sup>1, 2</sup> Then, the room-temperature EPR was performed to further investigate the existence and the type of defects. In Fig. S2b, the FVO<sub>40</sub>-MS and MS show distinct EPR signals, giving the g-value of 2.003, which could be indexed as the surface S vacancies (V<sub>S</sub>).<sup>3</sup> Notably, the EPR intensity of FVO<sub>40</sub>-MS is much stronger than that of pure MS, indicating that the introduction of FVO into MS brings more defects of V<sub>S</sub> in FVO/MS heterojunction structure.<sup>3, 4</sup> The greatly enhanced V<sub>S</sub> in the FVO/MS heterostructure leads to the decreasing of spontaneous non-radiative recombination from the trap states,<sup>5-7</sup> which resulted the enhancement of the fluorescence intensity.

References:

1. M. Dan, J. Xiang, F. Wu, S. Yu, Q. Cai, L. Ye, Y. Ye and Y. Zhou, Appl. Catal., B, 2019, 256.
2. Y. Wu, X. Chen, J. Cao, Y. Zhu, W. Yuan, Z. Hu, Z. Ao, G. W. Brudvig, F. Tian,

- J. C. Yu and C. Li, Appl. Catal., B, 2022, 303.
3. M. Dan, J. Xiang, F. Wu, S. Yu, Q. Cai, L. Ye, Y. Ye and Y. Zhou, Appl. Catal., B, 2019, 256.
  4. S. Jiang, N. Ji, X. Diao, H. Li, Y. Rong, Y. Lei and Z. Yu, Chemsuschem, 2021, 14, 4377-4396.
  5. L. Xu, L. Zhao, Y. Wang, M. Zou, Q. Zhang and A. Cao, Nano Res, 2019, 12, 1619-1624.
  6. X. Zhu, M. Du, J. Feng, H. Wang, Z. Xu, L. Wang, S. Zuo, C. Wang, Z. Wang, C. Zhang, X. Ren, S. Priya, D. Yang and S. Liu, Angew. Chem., Int. Ed., 2021, 60, 4238-4244.
  7. Y. Miao, G. Sathiyar, H. Wang, Y. Tian, C. Chen, X. Ding, M. Zhai, X. Yang and M. Cheng, Chem. Eng. J, 2021, 426.

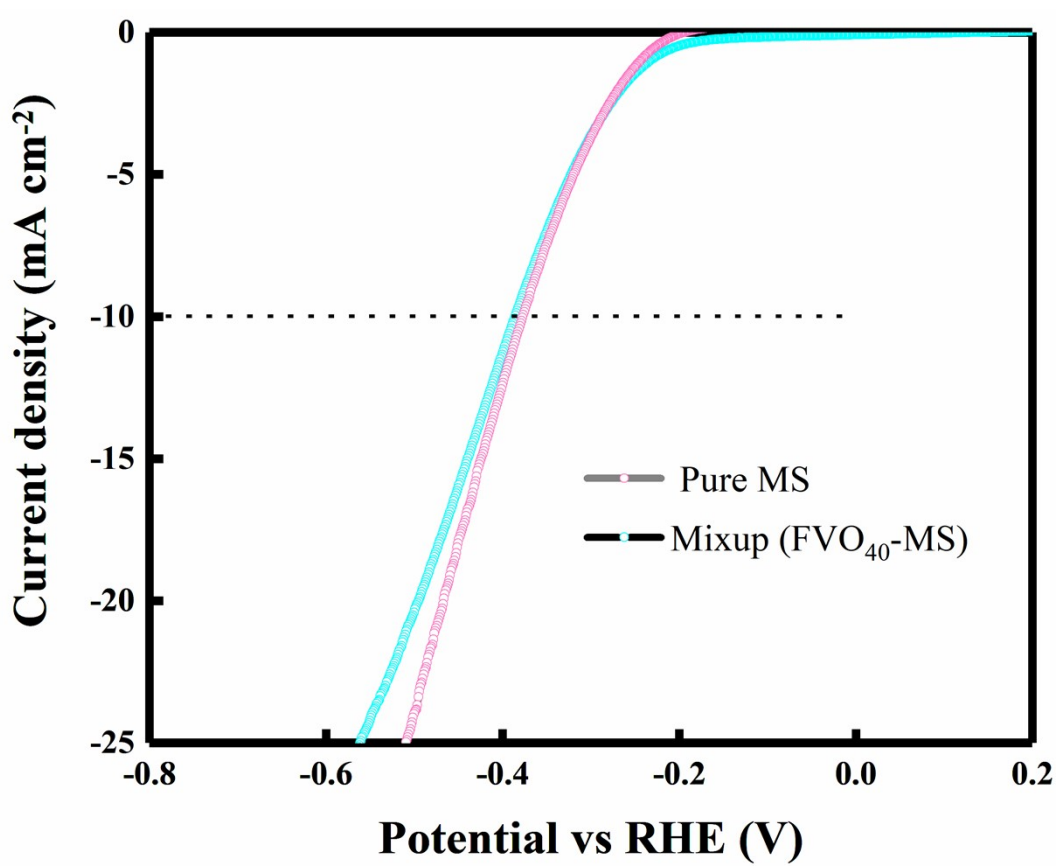

**Fig. S3.** LSV curve of FVO/MS mechanical mixing up in the same proportion of FVO<sub>40</sub>- MS served as a contrast to pure MS.

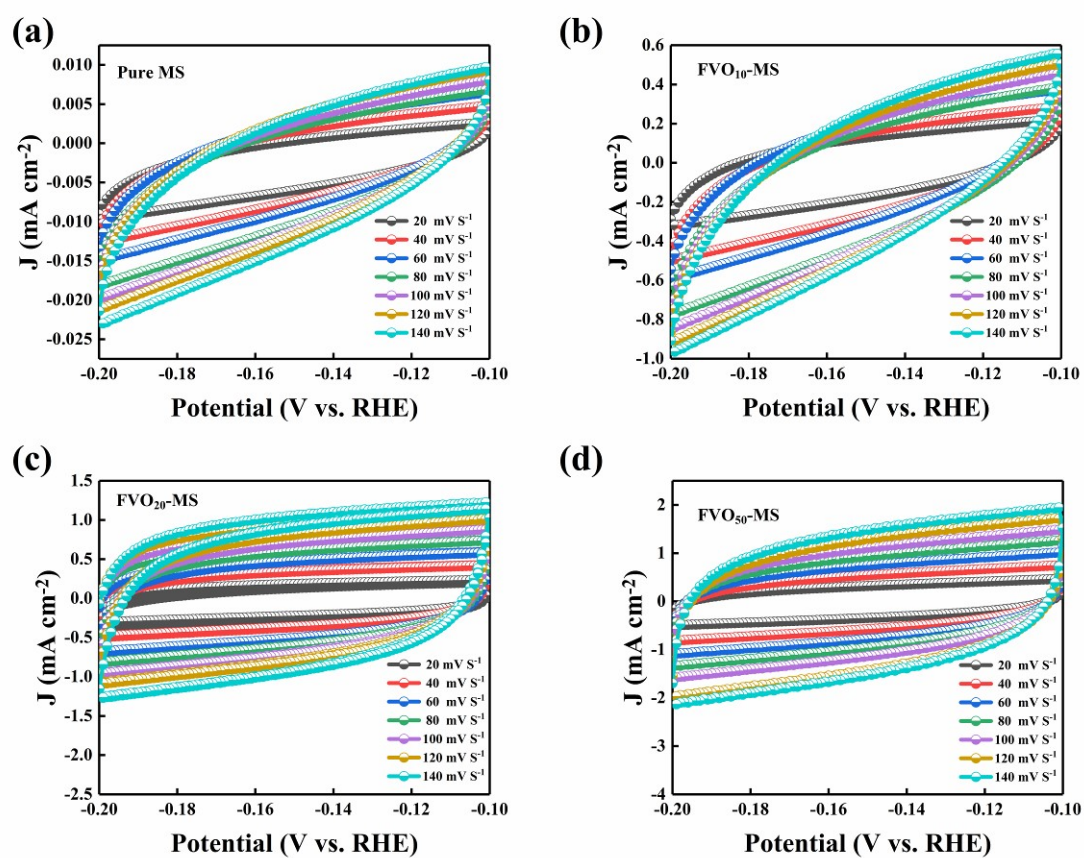

**Fig. S4.** The Cyclic voltammetry curves of (a) MS; (b) FVO<sub>10</sub>-MS; (c) FVO<sub>20</sub>-MS and (d) FVO<sub>50</sub>-MS at various scan rates (20-140 mV/s) in the region of -0.1~ -0.2 V.

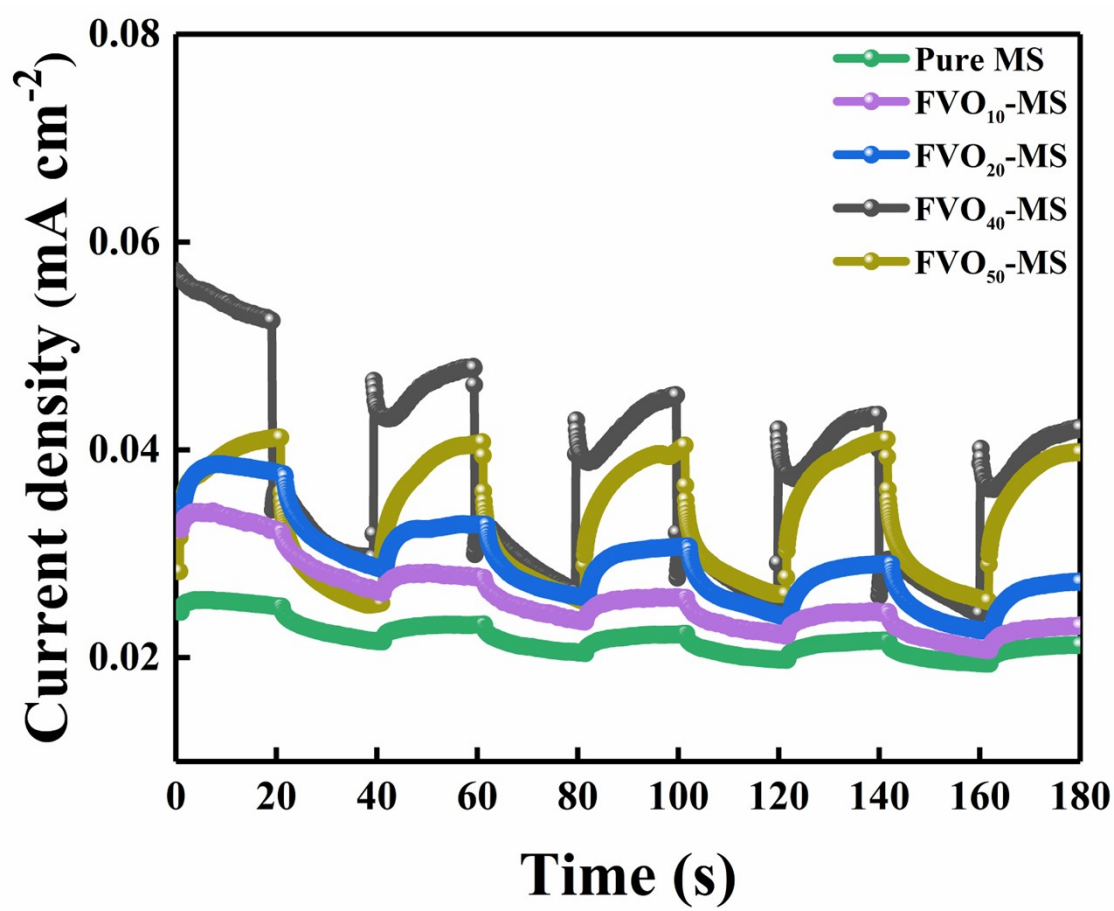

**Fig. S5.** (a) Transient photocurrent responses of the as-prepared samples under visible light; (b) Nitrogen adsorption–desorption isotherms of pure MoS<sub>2</sub> and FVO<sub>40</sub>-MS.

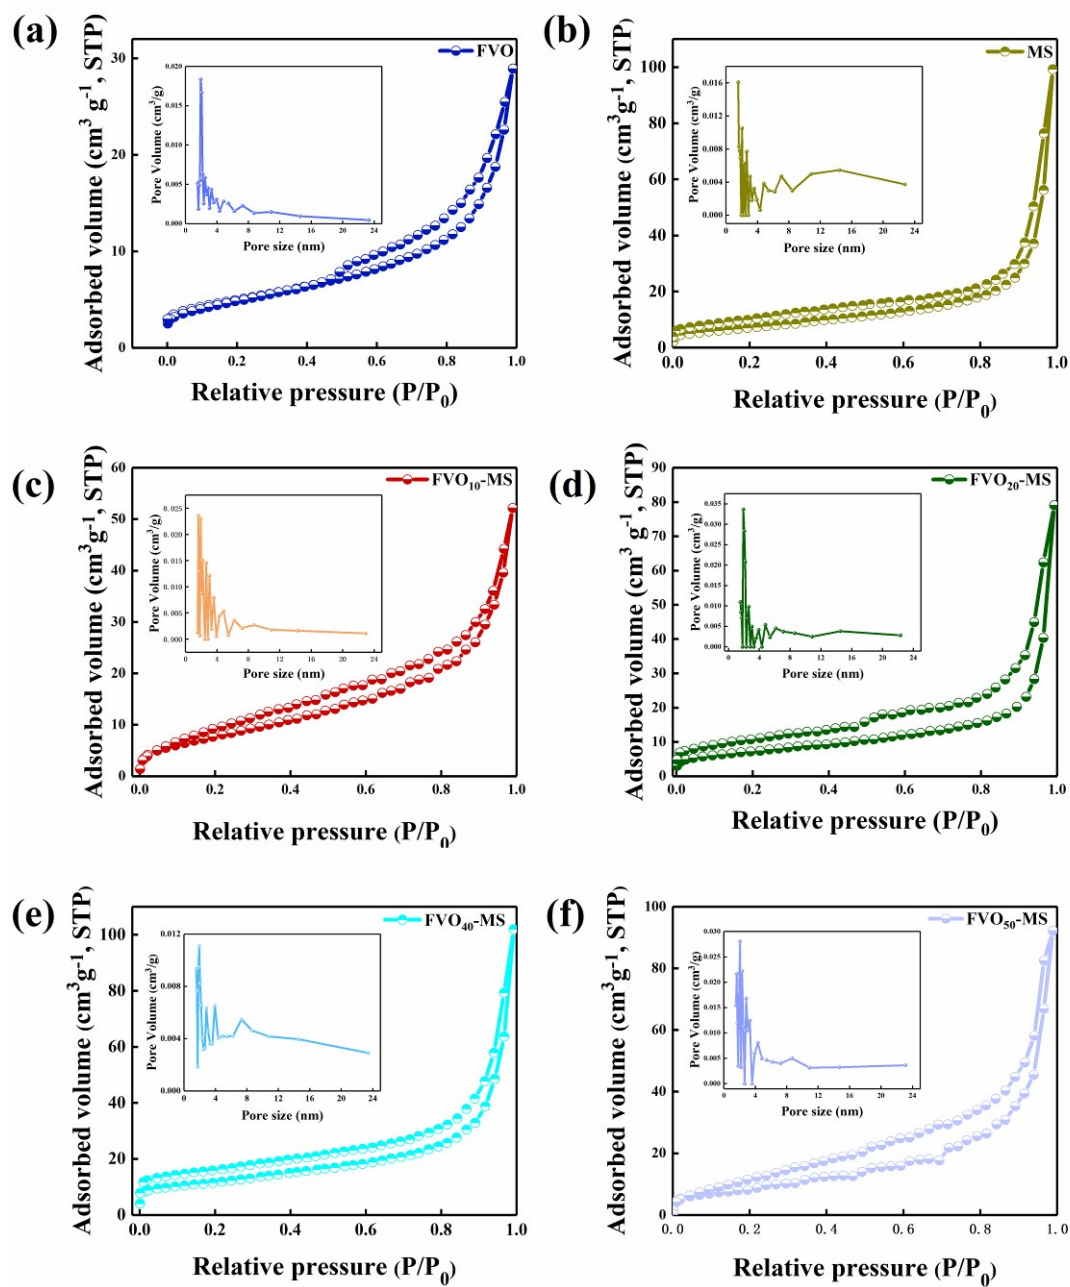

**Fig. S6.** Nitrogen adsorption–desorption isotherms and the corresponding pore size distribution curves of (a) FVO, (b) MS, (c) FVO<sub>10</sub>-MS, (d) FVO<sub>20</sub>-MS, (e) FVO<sub>40</sub>-MS and (f) FVO<sub>50</sub>-MS.



## UV-Vis DRS and UPS analysis of the as-prepared samples

To further estimate the band gap structure of MS, FVO and FVO<sub>40</sub>-MS, the UV-Vis diffuse reflectance spectrum (UV-Vis DRS) and ultraviolet photoelectron spectroscopy (UPS) analysis were carried out (Fig. S8). The band gap energy was determined based on the UV-Vis DRS absorption spectrum curve and calculated according to equation 1 (see ref.7) :  $\alpha h\nu = A (h\nu - E_g)^{n/2}$ , in which  $\alpha$ ,  $\nu$ ,  $A$ , and  $E_g$  are the absorption coefficient, light frequency, proportionality constant, and band gap, respectively. The value of  $n$  depends on the characteristic of optical transition of the material. For FeV<sub>3</sub>O<sub>8</sub> (direct semiconductor),  $n$  is 1 (see ref.9); while for MoS<sub>2</sub> (indirect semiconductor),  $n=4$  (see ref.10). Bandgap curves of FeV<sub>3</sub>O<sub>8</sub> and MoS<sub>2</sub> were collected using the Tauc plot based on the UV-Vis DRS data (Fig. S7a-7c). The value of the intersection of the tangent line with the horizontal axis represents the bandgap energy. The  $E_g$  of FeV<sub>3</sub>O<sub>8</sub> and MoS<sub>2</sub> were 2.4 eV and 2.0 eV, respectively.

The work function ( $W_f$ ) obtained from UPS study are used to investigate the behaviors of charge separation and transfer along the FVO/MS heterojunction. The calculation of  $W_f$  is based on the following equation:  $W_f = h\nu - E_{\text{onset}}$  (see ref.11), where  $W_f$  was determined by subtracting the secondary cut off edge value ( $E_{\text{onset}}$ ) with linear extrapolation towards the background from the He-I excitation light source ( $h\nu$ , 21.2 eV). From the UPS results (Fig. S7d-7f), the  $W_f$  of the FVO, MS and FVO<sub>40</sub>-MS are 5.5 eV, 5.3 eV and 5.6 eV. Thus the valence band (VB) for FeV<sub>3</sub>O<sub>8</sub> and MoS<sub>2</sub> are calculated to 2.2 eV and 1.9 eV, respectively.  $W_f$  was defined as the energy required to remove an electron at the  $E_f$  deep-seated inside the material and place it at infinity ( $E_{\text{VAC}}=0$ ), which is based on the formula:  $E_f = E_{\text{VAC}} - W_f$  (see ref.11). Thus, the value of  $E_f$  for FVO, MS and FVO<sub>40</sub>-MS are -5.5 eV, -5.3 eV and -5.6 eV, respectively. Then, the conduction bands (CB) of FeV<sub>3</sub>O<sub>8</sub> and MoS<sub>2</sub> are calculated via equation 2 (see ref.7):  $E_{\text{CB}} = E_{\text{VB}} - E_g$ , and the corresponding  $E_{\text{CB}}$  values are -0.2 eV and -0.1 eV, respectively. The detailed parameters of band structure for pure FeV<sub>3</sub>O<sub>8</sub> and MoS<sub>2</sub> are shown in Fig. S8a. When FeV<sub>3</sub>O<sub>8</sub>/MoS<sub>2</sub> heterostructure was formed, there will be a shift of Fermi levels in the semiconductor interface owing to the different  $W_f$  (see ref.8). In general, electrons transfer from a higher Fermi level to a lower one. According to the results of UPS measurement, the  $W_f$  of pure FeV<sub>3</sub>O<sub>8</sub> (5.5 eV) is higher than that of MoS<sub>2</sub> (5.3 eV). Therefore, the band bending of MoS<sub>2</sub> is upward, while the band bending of FeV<sub>3</sub>O<sub>8</sub> is downward (see Fig. S8b and ref.13). Based on

the relative energy band structure of  $\text{FeV}_3\text{O}_8$  and  $\text{MoS}_2$ , the charge transfer route of FVO/MS belongs to Type-I heterojunction (see ref.14 and ref.15). The electrons in VB of  $\text{FeV}_3\text{O}_8$  are excited to the CB under light illumination. Then, the photo-generated electrons will immediately shift to the CB of  $\text{MoS}_2$ . As lots of photo-induced electrons rapidly migrate to the active sites at the edge of  $\text{MoS}_2$  nanosheet and participate the hydrogen evolution reaction, the HER activity of the  $\text{MoS}_2$  was significantly enhanced.

#### References:

8. T. Yu, Q. Liu, Z. Zhu, W. Wu, L. Liu, J. Zhang, C. Gao and T. Yang, *Sep. Purif. Technol.*, 2021, 277, 119276.
9. L.F. Zhang, J. Zhou and C.-Y. Zhang, *J. Mater. Chem. A*, 2014, 2, 14903-14907.
10. S. Tongay, J. Zhou, C. Ataca, K. Lo, T. S. Matthews, J. Li, J. C. Grossman and J. Wu, *Nano Lett.*, 2012, 12, 5576-5580.
11. W. M. Huang, W. S. Liao, Y. M. Lai and I. W. P. Chen, *J. Mater. Chem. C*, 2020, 8, 510-517.
12. A. Atxabal, T. Arnold, S. Parui, E. Zuccatti, M. Cinchetti, F. Casanova, F. Ortmann and L. E. Hueso, *Mater. Horiz.*, 2019, 6, 1663-1668.
13. Y. Li, P. Zhang, D. Wan, C. Xue, J. Zhao and G. Shao, *Appl. Surf. Sci.*, 2020, 504, 144361.
14. P. Yang, Z. Zhang, M. Sun, F. Lin, T. Cheng, J. Shi, C. Xie, Y. Shi, S. Jiang, Y. Huan, P. Liu, F. Ding, C. Xiong, D. Xie and Y. Zhang, *Acs Nano*, 2019, 13, 3649-3658.
15. T. Jiang, T. Xie, L. Chen, Z. Fu and D. Wang, *Nanoscale*, 2013, 5, 2938-2944.

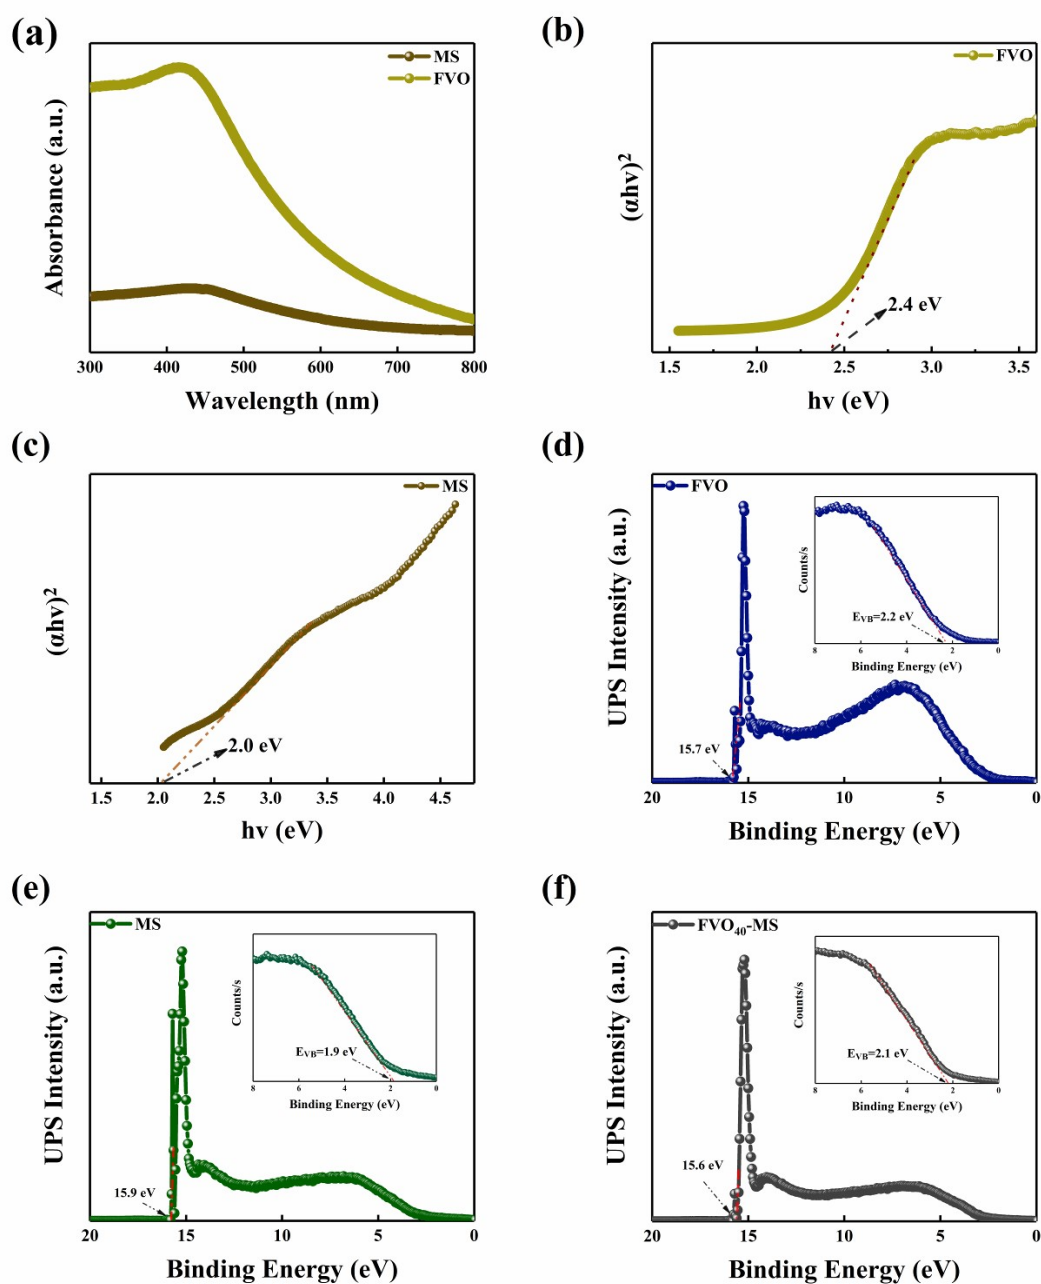

**Fig. S7.** (a) UV-Vis DRS spectra of MoS<sub>2</sub> and FeV<sub>3</sub>O<sub>8</sub>, Tauc plot of (b) MoS<sub>2</sub> and (c) FeV<sub>3</sub>O<sub>8</sub>, (d-f) UPS spectra and corresponding  $E_{CB}$  curves (inset) of FVO, MS and FVO<sub>40</sub>-MS.

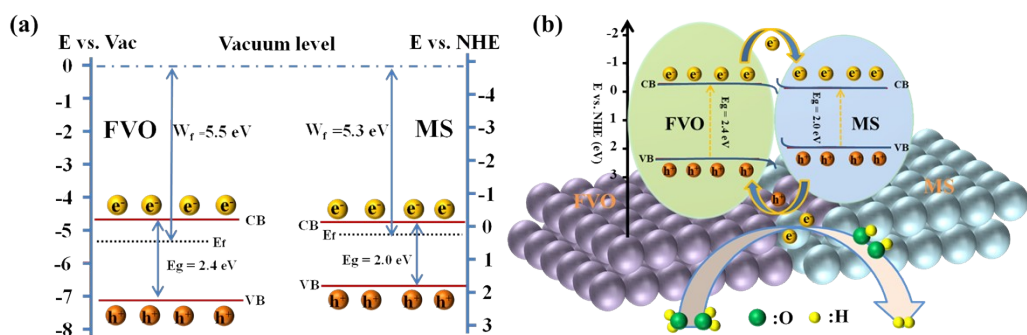

**Fig. S8.** (a)The band structures of FVO and MS, (b) Mechanism graph of electronic transfer in FVO/MS heterostructure.

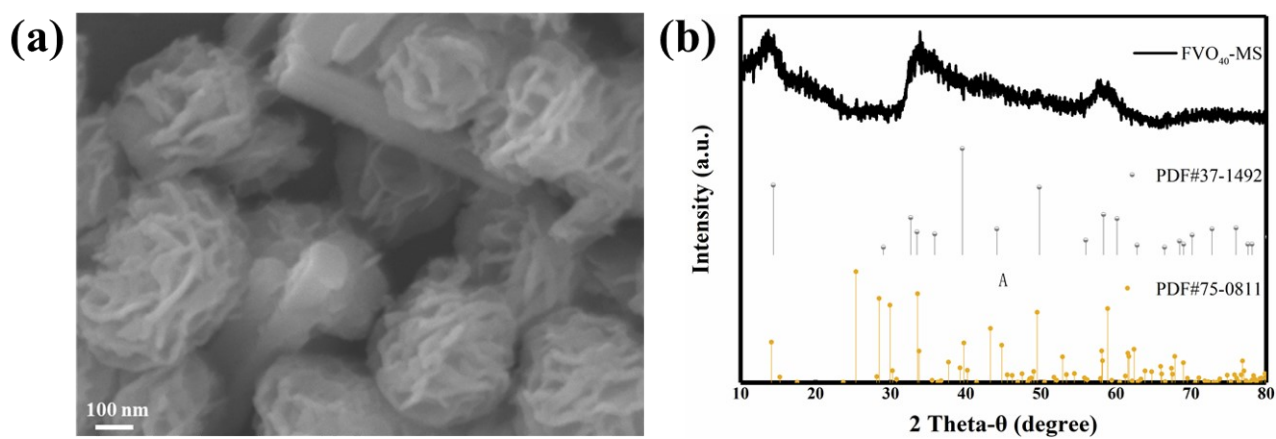

**Fig. S9.** (a) FESEM image and (b) XRD pattern of FVO<sub>40</sub>-MS after HER tests.
